# Supplementary material
Source: publisher figshare collection journal article supplement (https://aacr.figshare.com/articles/dataset/_/23579642)

## SUPPLEMENTARY FIGURE LEGENDS AND FIGURES

**Supplementary Figure S1.** A) Sanger sequencing trace of XTC.UC1 PCR-amplified *MT-ND1*. B) Tumor volume of NCI-237-R<sup>PDX</sup> implanted subcutaneously in immunodeficient mice. Data are plotted as mean  $\pm$  SD of 4 tumors. C) Sanger sequencing trace of *MT-ND5*. D) Sanger sequencing trace of *MT-ND1*. E) Sanger sequencing trace of *DNMT3A*. F) Sanger sequencing trace of *NF1*. G) Sanger sequencing trace of *NF2*. Sanger sequencing traces in C-G come from direct sequencing of PCR products amplified from NCI-237-R<sup>PDX</sup>. H) Tumor volume of NCI-237<sup>UTSW</sup> cells injected subcutaneously in immunodeficient mice. Data are plotted as mean  $\pm$  SD of 4 tumors. I) Sanger sequencing trace of *MT-ND5*. J) Sanger sequencing trace of *MT-ND1*. K) Sanger sequencing trace of *DNMT3A*. L) Sanger sequencing trace of *NF1*. M) Sanger sequencing trace of *NF2*. Sanger sequencing traces in I-M come from direct sequencing of PCR products amplified from NCI-237<sup>UTSW</sup> cells. N) Oxygen consumption rates for intact cells;  $n = 6-8$  replicates. Oligo = oligomycin; CCCP = carbonyl cyanide 3-chlorophenylhydrazone; Anti A = antimycin A. NCI-237<sup>xeno</sup> cells are from an NCI-237<sup>UTSW</sup> xenograft tumor formed in immunodeficient mice. Cells were assayed for oxygen consumption approximately 24 hours after tumor dissociation. Data are plotted as mean  $\pm$  SEM. O) Schematic for labeling of key central carbon metabolites from [U-<sup>13</sup>C<sub>6</sub>] glucose under canonical oxidative conditions (*top*) or pyruvate carboxylase-mediated TCA cycle anaplerosis (*bottom*). PDH = pyruvate dehydrogenase; CS = citrate synthase; PCB = pyruvate carboxylase; GOT2 = glutamic-oxaloacetic transaminase 2; OAA = oxaloacetate. P) Mass isotopomer abundance for the indicated metabolites in cells cultured with [U-<sup>13</sup>C<sub>6</sub>] glucose for 6 hours. Data are plotted as mean  $\pm$  SEM of 3 replicates.  $\alpha$ -KG = alpha-ketoglutarate.

# Supplementary Figure S1

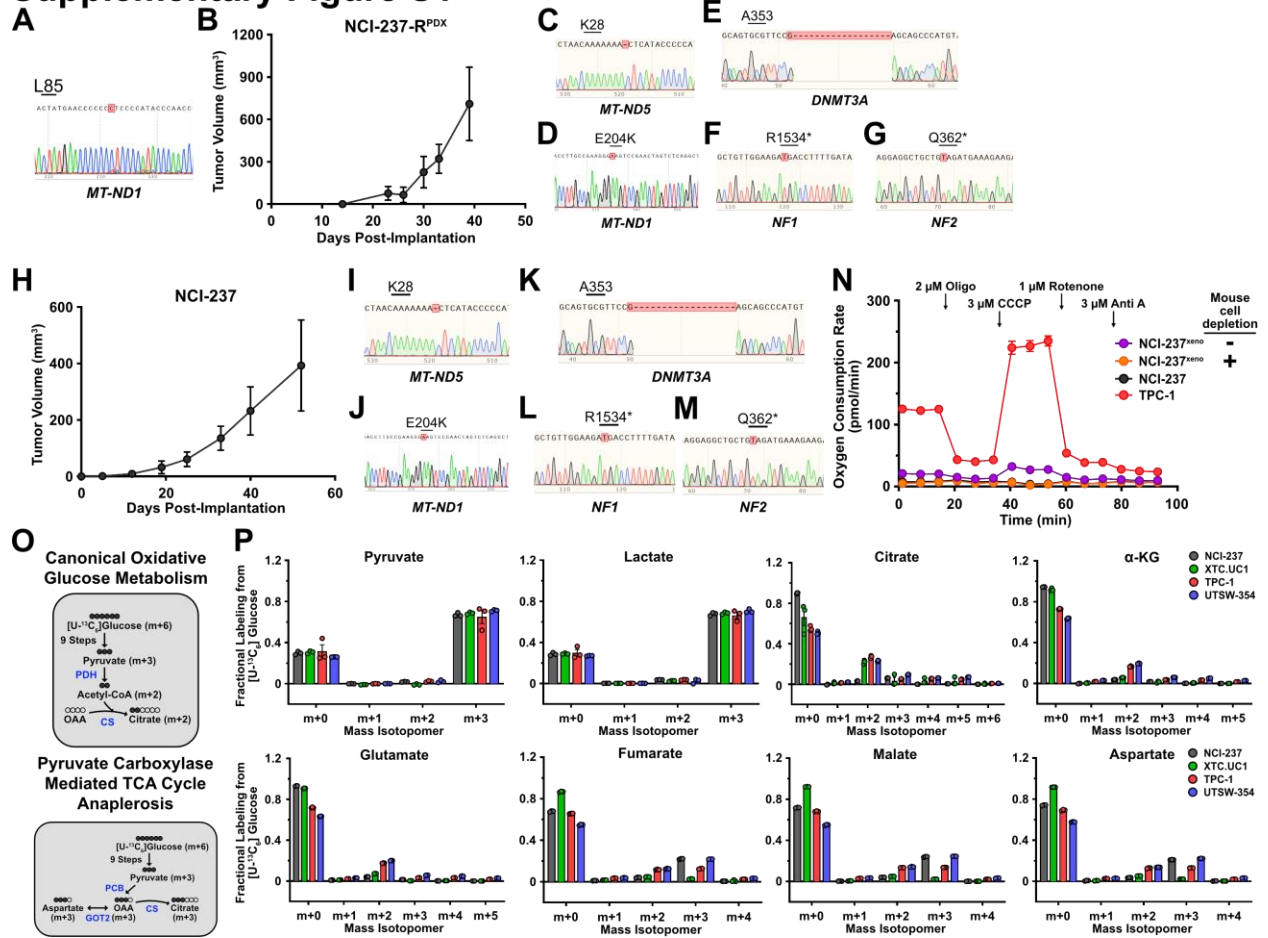

**Supplementary Figure S2.** A) Growth curves of NCI-237<sup>RPMI</sup> and TPC-1<sup>RPMI</sup> in primary genome-wide CRISPR-Cas9 knockout screen. B) Plot of genes for NCI-237<sup>RPMI</sup> based on median log<sub>2</sub> fold-change in sgRNA abundance. C) Plot of genes for TPC-1<sup>RPMI</sup> based on median log<sub>2</sub> fold-change in sgRNA abundance. Enriched genes are highlighted in blue; depleted genes are highlighted in red. D) Growth curves of NCI-237<sup>RPMI</sup>, TPC-1<sup>RPMI</sup>, and UTSW-354<sup>RPMI</sup> replicates (*n* = 2) in targeted validation screen. E) Growth curves of NCI-237<sup>HPLM</sup>, TPC-1<sup>HPLM</sup>, and UTSW-354<sup>HPLM</sup> replicates (*n* = 2) in targeted validation screen. F) Plot of gene log<sub>2</sub> fold-change values for NCI-237<sup>RPMI</sup> and NCI-237<sup>HPLM</sup> validation screens. Data reflect median log<sub>2</sub> fold-change in sgRNA abundance based on 2 replicates for each condition. G) Plot of genes from validation screen based on Depletion Score comparing NCI-237<sup>RPMI</sup> and TPC-1<sup>RPMI</sup>. H) Plot of genes from validation screen based on Depletion Score comparing NCI-237<sup>RPMI</sup> and UTSW-354<sup>RPMI</sup>. Depletion Score for G) and H) are calculated as [(NCI-237<sup>RPMI</sup> gene log<sub>2</sub> fold-change) – (TPC-1<sup>RPMI</sup>/UTSW-354<sup>RPMI</sup> gene log<sub>2</sub> fold-change)]. Gene log<sub>2</sub> fold-change values reflect median log<sub>2</sub> fold-change in sgRNA abundance based on 2 replicates for each cell line. I) Fold-change in cell number of indicated cell lines in media lacking glucose or galactose, media containing 5 mM galactose, or media containing 5 mM glucose. Data are plotted as mean ± SEM of 3 replicates. Dashed line = 1.

# Supplementary Figure S2

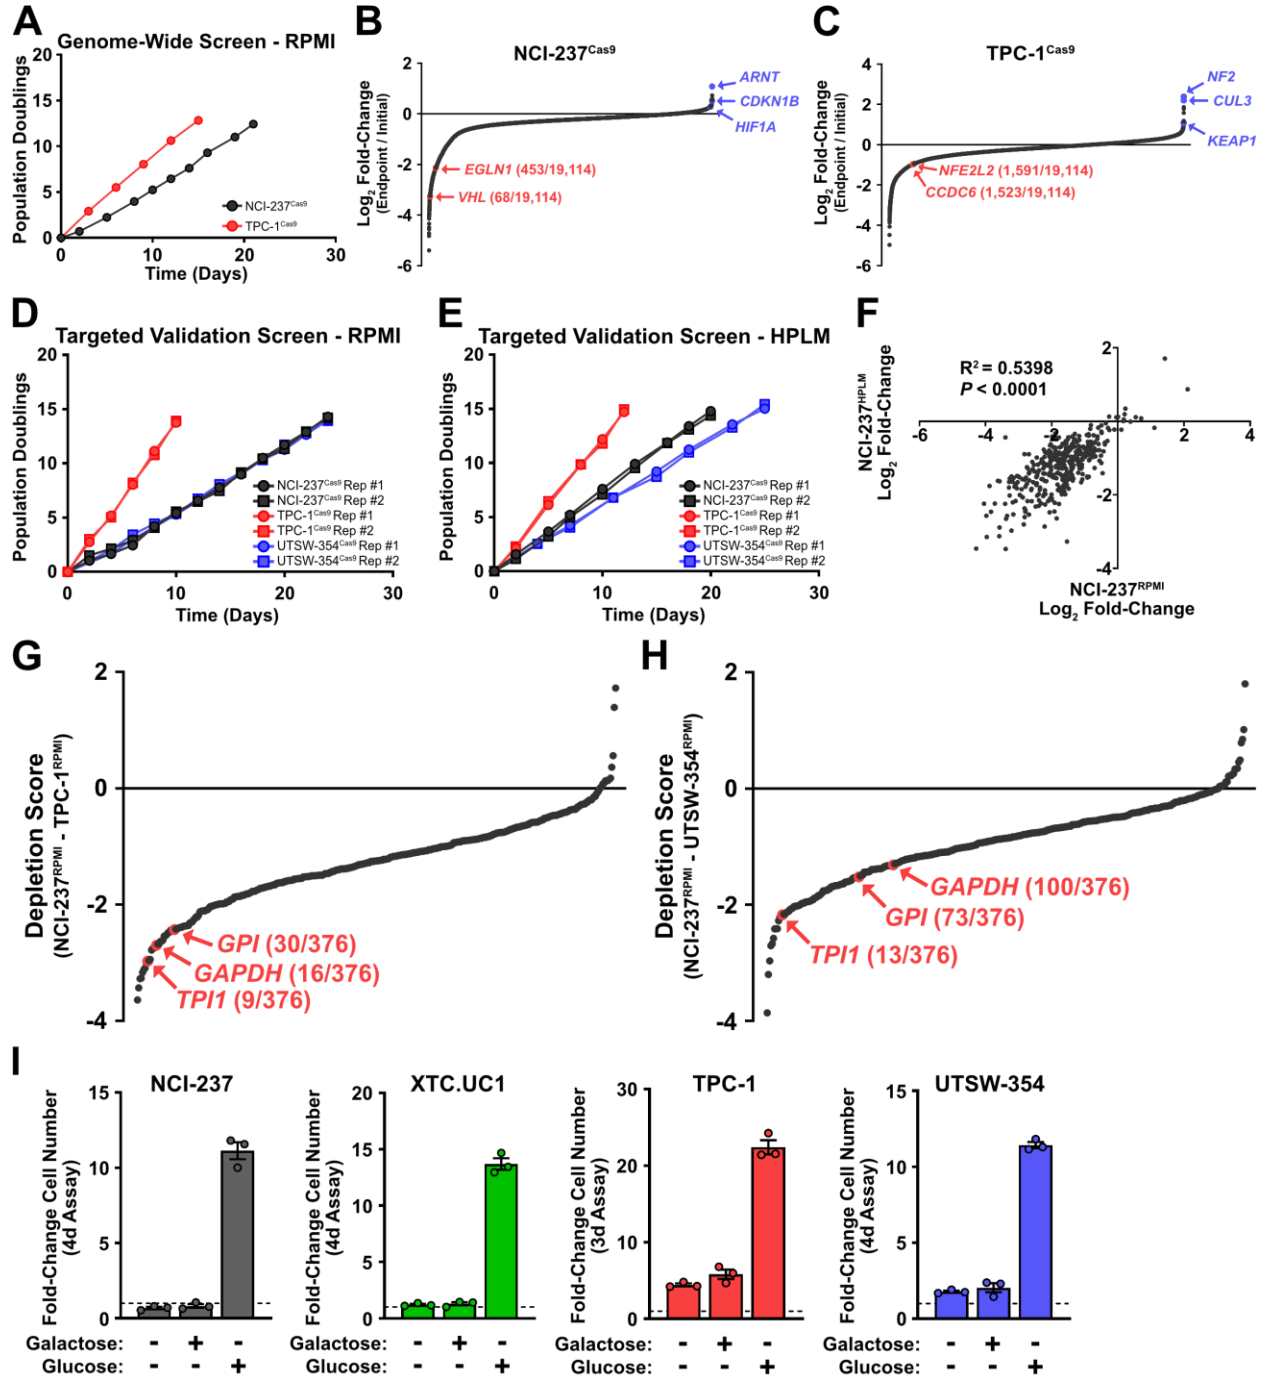

**Supplementary Figure S3.** A) Viability assay for cells treated with 2-DG for 3 days. B) Viability assay for cells treated with POMHEX for 3 days. C) Viability assay for cells treated with (R)-GNE-140 for 3 days. D) Viability assay for cells treated with NCGC00420737 for 3 days. E) Viability assay for UTSW-354 cotreated with (R)-GNE-140 and indicated doses of piericidin A for 3 days. F) Viability assay for UTSW-354 cotreated with NCGC00420737 and indicated doses of piericidin A for 3 days. Data are plotted as mean  $\pm$  SEM of 2 replicates. G) Table of RNA-Seq FPKM values for *LDH* genes in indicated cell lines.

# Supplementary Figure S3

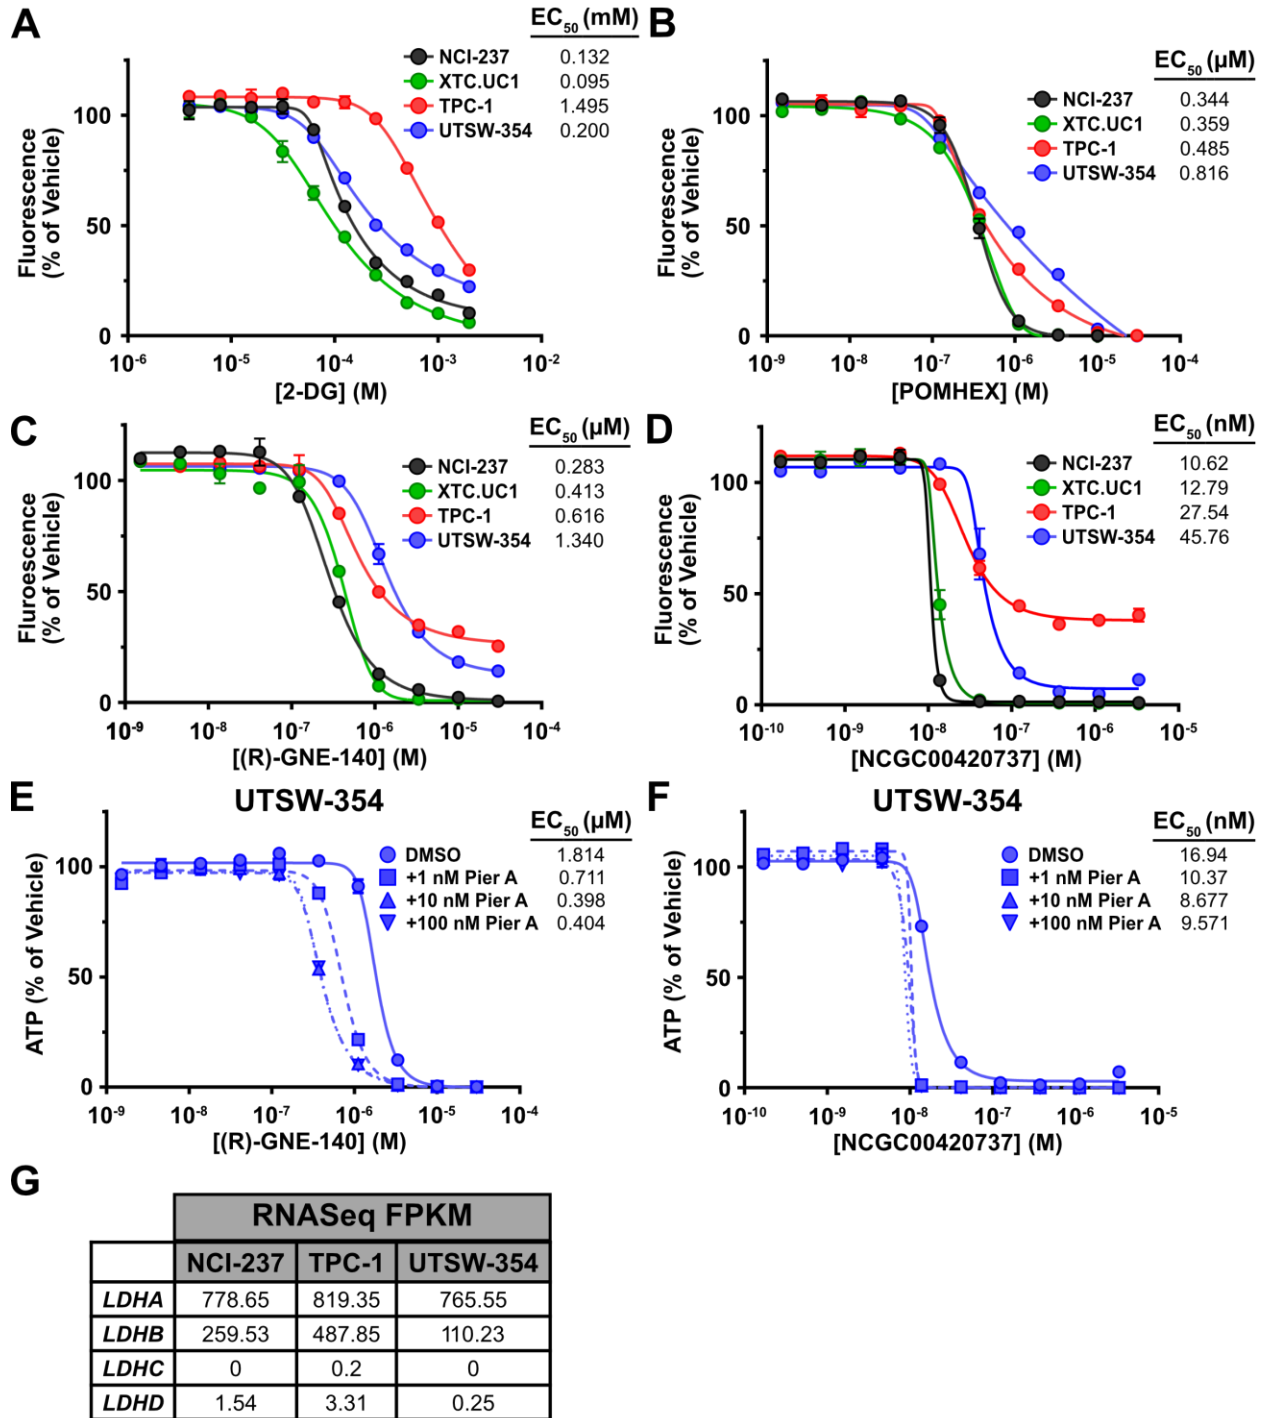

**Supplementary Figure S4.** A) NADH:NAD<sup>+</sup> ratio in cells treated with (R)-GNE-140 for 4 hours; *n* = 2 replicates. B) Metabolite levels in NCI-237<sup>UTSW</sup> cells treated with 40 nM NCGC00420737 for 4 hours; *n* = 3 replicates. DHAP = dihydroxyacetone phosphate. C) Metabolite levels in NCI-237<sup>UTSW</sup> cells treated with 1 μM (R)-GNE-140 for 4 hours; *n* = 3 replicates. G-3-P = glyceraldehyde-3-phosphate; DHAP = dihydroxyacetone phosphate; 3-PG = 3-phosphoglycerate. D) Immunoblot for phospho-AMPKα<sup>T172</sup> and total AMPKα in NCI-237<sup>UTSW</sup> cells treated with indicated doses of (R)-GNE-140 and NCGC00420737 for 4 hours.

# Supplementary Figure S4

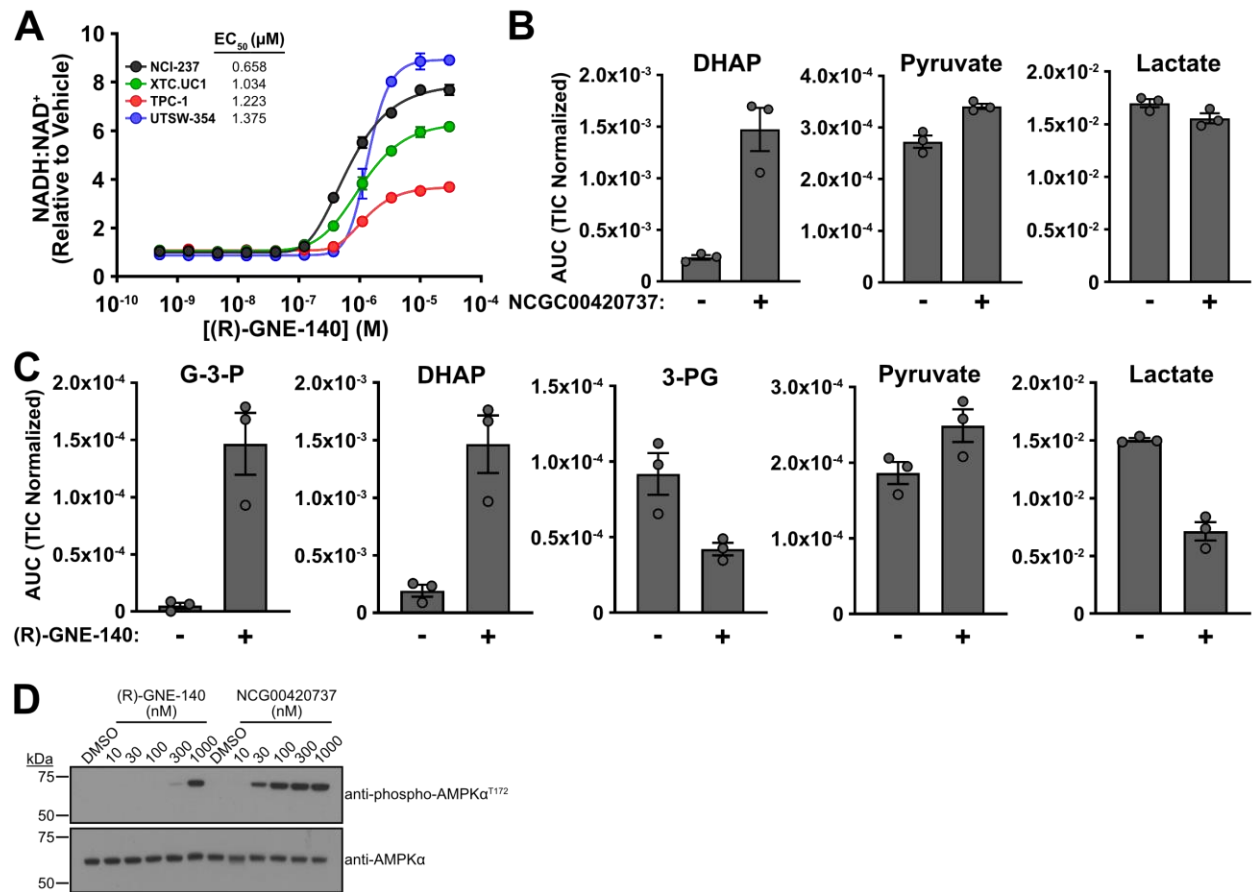



**Supplementary Figure S5.** A) Immunoblot for FLAG epitope tag in NCI-237<sup>UTSW</sup> cells with inducible expression of indicated constructs. Cells were exposed to 100 ng/mL doxycycline for 24 hours prior to collection. B) NAD<sup>+</sup>:NADH ratio in NCI-237<sup>UTSW</sup> cells with inducible expression of indicated constructs. Cells were exposed to 100 ng/mL doxycycline for 24 hours prior to collection; *n* = 5 replicates. C) Crystal violet staining of NCI-237<sup>UTSW</sup> cells cultured for 4 days under the indicated conditions. D) Viability of NCI-237<sup>UTSW</sup> cells cultured under the indicated conditions for 48 hours; *n* = 4 replicates from 2 independent experiments. E) Oxygen consumption rates for intact NCI-237<sup>UTSW</sup> cells expressing the indicated constructs; *n* = 6-8 replicates. Oligo = oligomycin; CCCP = carbonyl cyanide 3-chlorophenylhydrazone; Anti A = antimycin A. F) Mass isotopomer abundance for the indicated metabolites in NCI-237<sup>UTSW</sup> cells cultured with [U-<sup>13</sup>C<sub>6</sub>] glucose for 4 hours; *n* = 3 replicates. G) Metabolite levels in NCI-237<sup>UTSW</sup> cells expressing AcGFP, NDI1, or *Lb*NOX treated with 40 nM NCGC00420737 for 4 hours; *n* = 3 replicates. DHAP = dihydroxyacetone phosphate. H) Metabolite levels in NCI-237<sup>UTSW</sup> cells expressing AcGFP, NDI1, or *Lb*NOX treated with 1 μM (R)-GNE-140 for 4 hours; *n* = 3 replicates. G-3-P = glyceraldehyde-3-phosphate; DHAP = dihydroxyacetone phosphate; 3-PG = 3-phosphoglycerate. I) ATP levels in cells treated with (R)-GNE-140 for 4 hours; *n* = 4 replicates from 2 independent experiments. Concentrations are 0.041, 0.37, 3.33, and 30 μM (R)-GNE-140. J) ATP levels in NCI-237<sup>UTSW</sup> cells treated with NCGC00420737 for 4 hours; *n* = 4 replicates from 2 independent experiments. Concentrations are 0.014, 0.123, 1.11, and 10 μM NCGC00420737. Data for are plotted as mean ± SEM of indicated number of replicates.

# Supplementary Figure S5

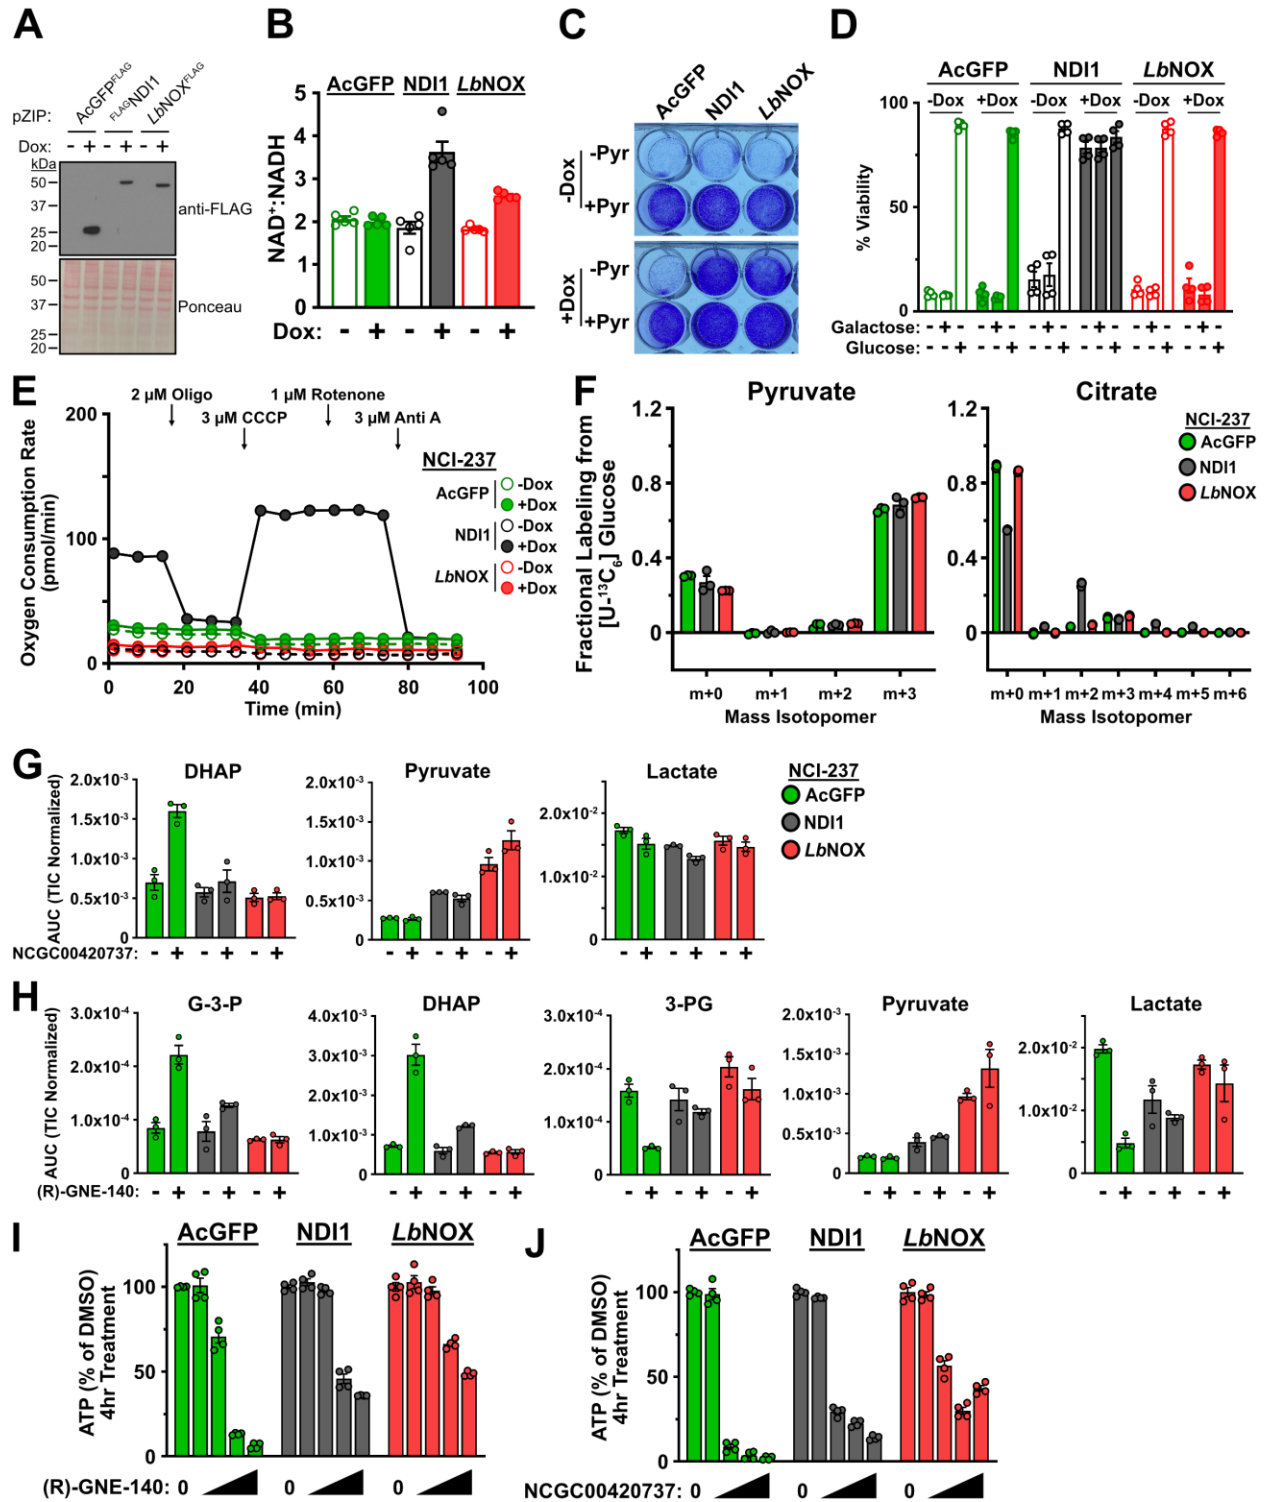

**Supplementary Figure S6.** A) Individual tumor volumes for NCI-237-R<sup>PDX</sup> xenografts treated with vehicle ( $n = 5$ ), 30 mg/kg NCGC00420737 ( $n = 4$ ), or 60 mg/kg NCGC00420737 ( $n = 5$ ). Vehicle or compound was administered once daily via jugular vein catheter for two treatment cycles (5 days on, 2 days off). A final compound administration was performed on Day 6 of Cycle 2 and animals were sacrificed 1 hour after receiving compound. B) Animal weight for NCI-237-R<sup>PDX</sup>-bearing immunodeficient mice treated with vehicle ( $n = 5$ ), 30 mg/kg NCGC00420737 ( $n = 4$ ), or 60 mg/kg NCGC00420737 ( $n = 5$ ). C) Red blood cell (left), hematocrit (center), and hemoglobin (right) levels in EDTA-treated whole blood. Blood was collected 1 hour after final administration of compound. D) Volcano plot comparing metabolite levels in NCI-237-R<sup>PDX</sup> tumors treated with vehicle or 30 mg/kg NCGC00420737. Metabolite levels were determined using LC-MS/MS. Horizontal dashed line = 1.3 ( $P$ -value  $\cong 0.05$ ); vertical dashed lines = -1 and 1. E) Volcano plot comparing metabolite levels in NCI-237-R<sup>PDX</sup> tumors treated with vehicle or 60 mg/kg NCGC00420737. Metabolite levels were determined using LC-MS/MS. Horizontal dashed line = 1.3 ( $P$ -value  $\cong 0.05$ ); vertical dashed lines = -1 and 1.  $P$ -values in D) and E) were determined using two-sided  $T$ -test assuming unequal variance. F) Immunoblot for phospho-AMPK $\alpha$ <sup>T172</sup> and total AMPK $\alpha$  in NCI-237-R<sup>PDX</sup> tumors. G) Plasma and tumor concentrations of NCGC00420737 determined by LC-MS/MS. Blood and tumors were collected 1 hour after final administration of compound. Data are plotted as mean  $\pm$  SD of indicated number of replicates. H) Individual tumor volumes for NCI-237-R<sup>PDX</sup> xenografts treated with vehicle ( $n = 5$ ) or 60 mg/kg NCGC00420737 ( $n = 5$ ). Vehicle or compound was administered once daily via jugular vein catheter for the indicated number of treatment cycles (5 days on, 2 days off). Three animals receiving 60 mg/kg NCGC00420737 died between the end of Cycle 3 and start of Cycle 4. A final compound administration was performed on Day 2 of Cycle 4 and animals were sacrificed 1 hour after receiving compound. I) Final tumor mass for NCI-237-R<sup>PDX</sup> xenografts from Fig. 5G. J) Animal weight for NCI-237-R<sup>PDX</sup>-bearing immunodeficient mice treated with vehicle ( $n = 5$ ) or 60 mg/kg NCGC00420737 ( $n = 5$ ). K) Red blood cell and hematocrit levels in EDTA-treated whole blood. Blood was collected 1 hour after final administration of compound.

# Supplementary Figure S6

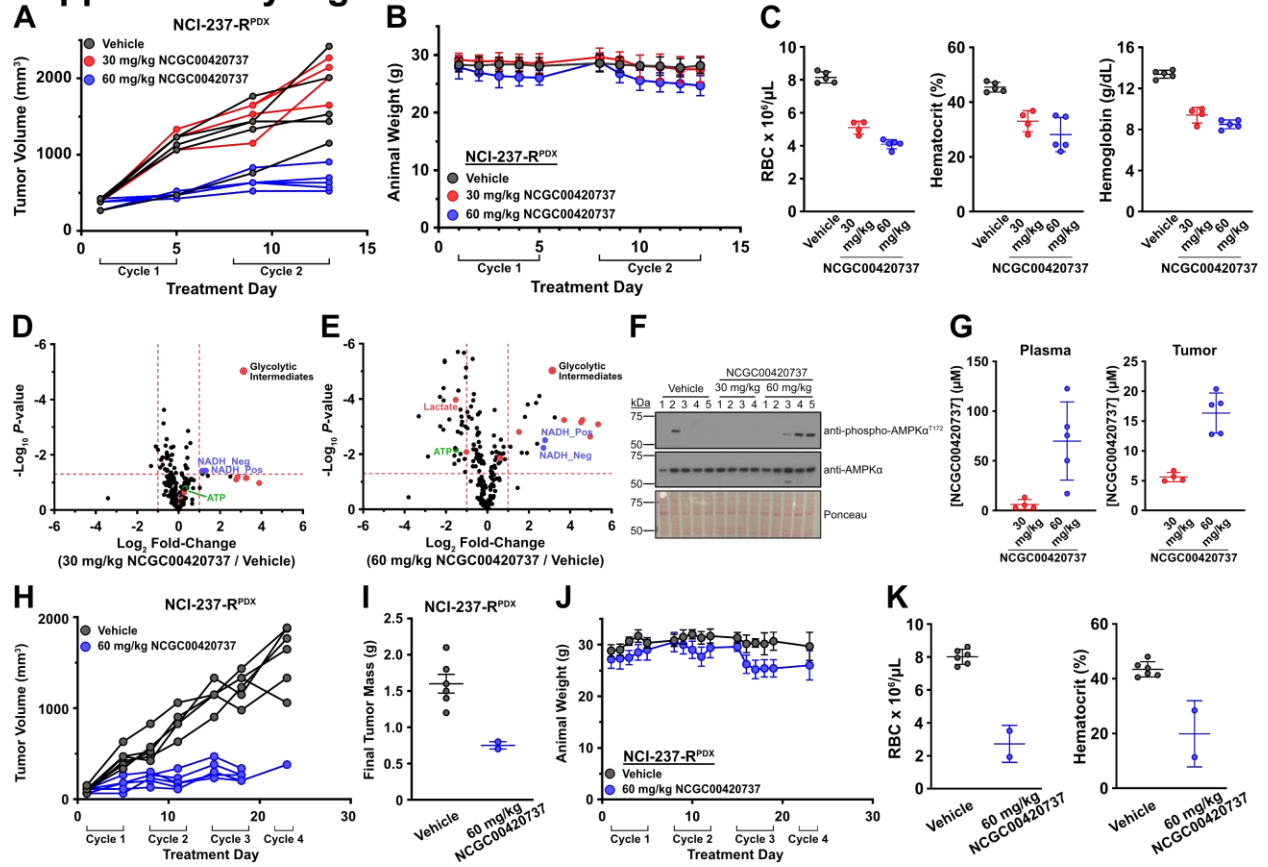

Supplement: Supplementary file 1 [file 41364176]
